# Supplementary material for: The Utility of Three-Dimensional Printing in Physician-Modified Stent Grafts for Aortic Lesions Repair
Source: MDPI journal article supplement (doi:10.3390/jcm13102977), 2024-05-18
Supplement: s1 [file s1]

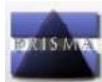

# PRISMA 2020 Checklist

## Supplementary File S1 Prisma 2020 Checklist

| Section and Topic             | Item # | Checklist item                                                                                                                                                                                                                                                                                       | Location where item is reported |
|-------------------------------|--------|------------------------------------------------------------------------------------------------------------------------------------------------------------------------------------------------------------------------------------------------------------------------------------------------------|---------------------------------|
| <b>TITLE</b>                  |        |                                                                                                                                                                                                                                                                                                      |                                 |
| Title                         | 1      | Identify the report as a systematic review.                                                                                                                                                                                                                                                          | 1,2                             |
| <b>ABSTRACT</b>               |        |                                                                                                                                                                                                                                                                                                      |                                 |
| Abstract                      | 2      | See the PRISMA 2020 for Abstracts checklist.                                                                                                                                                                                                                                                         | 20,105                          |
| <b>INTRODUCTION</b>           |        |                                                                                                                                                                                                                                                                                                      |                                 |
| Rationale                     | 3      | Describe the rationale for the review in the context of existing knowledge.                                                                                                                                                                                                                          | 31-92                           |
| Objectives                    | 4      | Provide an explicit statement of the objective(s) or question(s) the review addresses.                                                                                                                                                                                                               | 93-96                           |
| <b>METHODS</b>                |        |                                                                                                                                                                                                                                                                                                      |                                 |
| Eligibility criteria          | 5      | Specify the inclusion and exclusion criteria for the review and how studies were grouped for the syntheses.                                                                                                                                                                                          | 107-129                         |
| Information sources           | 6      | Specify all databases, registers, websites, organisations, reference lists and other sources searched or consulted to identify studies. Specify the date when each source was last searched or consulted.                                                                                            | 131-144                         |
| Search strategy               | 7      | Present the full search strategies for all databases, registers and websites, including any filters and limits used.                                                                                                                                                                                 | 139                             |
| Selection process             | 8      | Specify the methods used to decide whether a study met the inclusion criteria of the review, including how many reviewers screened each record and each report retrieved, whether they worked independently, and if applicable, details of automation tools used in the process.                     | 145-161                         |
| Data collection process       | 9      | Specify the methods used to collect data from reports, including how many reviewers collected data from each report, whether they worked independently, any processes for obtaining or confirming data from study investigators, and if applicable, details of automation tools used in the process. | 145-161                         |
| Data items                    | 10a    | List and define all outcomes for which data were sought. Specify whether all results that were compatible with each outcome domain in each study were sought (e.g. for all measures, time points, analyses), and if not, the methods used to decide which results to collect.                        | 164-186                         |
|                               | 10b    | List and define all other variables for which data were sought (e.g. participant and intervention characteristics, funding sources). Describe any assumptions made about any missing or unclear information.                                                                                         | 173-186, 199-201                |
| Study risk of bias assessment | 11     | Specify the methods used to assess risk of bias in the included studies, including details of the tool(s) used, how many reviewers assessed each study and whether they worked independently, and if applicable, details of automation tools used in the process.                                    | 189-193                         |
| Effect measures               | 12     | Specify for each outcome the effect measure(s) (e.g. risk ratio, mean difference) used in the synthesis or presentation of results.                                                                                                                                                                  | 146-209                         |
| Synthesis methods             | 13a    | Describe the processes used to decide which studies were eligible for each synthesis (e.g. tabulating the study intervention characteristics and comparing against the planned groups for each synthesis (item #5)).                                                                                 | 237-250                         |
|                               | 13b    | Describe any methods required to prepare the data for presentation or synthesis, such as handling of missing summary statistics, or data conversions.                                                                                                                                                | 199-201                         |
|                               | 13c    | Describe any methods used to tabulate or visually display results of individual studies and syntheses.                                                                                                                                                                                               | 237-250, 275-290                |
|                               | 13d    | Describe any methods used to synthesize results and provide a rationale for the choice(s). If meta-analysis was performed, describe the model(s), method(s) to identify the presence and extent of statistical heterogeneity, and software package(s) used.                                          | 258-269                         |
|                               | 13e    | Describe any methods used to explore possible causes of heterogeneity among study results (e.g. subgroup analysis, meta-regression).                                                                                                                                                                 | 280-287                         |
|                               | 13f    | Describe any sensitivity analyses conducted to assess robustness of the synthesized results.                                                                                                                                                                                                         | -                               |
| Reporting bias assessment     | 14     | Describe any methods used to assess risk of bias due to missing results in a synthesis (arising from reporting biases).                                                                                                                                                                              | 291-318                         |



## PRISMA 2020 Checklist

| Section and Topic                              | Item # | Checklist item                                                                                                                                                                                                                                                                       | Location where item is reported |
|------------------------------------------------|--------|--------------------------------------------------------------------------------------------------------------------------------------------------------------------------------------------------------------------------------------------------------------------------------------|---------------------------------|
| Certainty assessment                           | 15     | Describe any methods used to assess certainty (or confidence) in the body of evidence for an outcome.                                                                                                                                                                                | 275-317                         |
| <b>RESULTS</b>                                 |        |                                                                                                                                                                                                                                                                                      |                                 |
| Study selection                                | 16a    | Describe the results of the search and selection process, from the number of records identified in the search to the number of studies included in the review, ideally using a flow diagram.                                                                                         | 162,163                         |
|                                                | 16b    | Cite studies that might appear to meet the inclusion criteria, but which were excluded, and explain why they were excluded.                                                                                                                                                          | 159-161                         |
| Study characteristics                          | 17     | Cite each included study and present its characteristics.                                                                                                                                                                                                                            | 237-250                         |
| Risk of bias in studies                        | 18     | Present assessments of risk of bias for each included study.                                                                                                                                                                                                                         | 291-318                         |
| Results of individual studies                  | 19     | For all outcomes, present, for each study: (a) summary statistics for each group (where appropriate) and (b) an effect estimate and its precision (e.g. confidence/credible interval), ideally using structured tables or plots.                                                     | 237-250                         |
| Results of syntheses                           | 20a    | For each synthesis, briefly summarise the characteristics and risk of bias among contributing studies.                                                                                                                                                                               | 291-318                         |
|                                                | 20b    | Present results of all statistical syntheses conducted. If meta-analysis was done, present for each the summary estimate and its precision (e.g. confidence/credible interval) and measures of statistical heterogeneity. If comparing groups, describe the direction of the effect. | 260-269                         |
|                                                | 20c    | Present results of all investigations of possible causes of heterogeneity among study results.                                                                                                                                                                                       | 280-284                         |
|                                                | 20d    | Present results of all sensitivity analyses conducted to assess the robustness of the synthesized results.                                                                                                                                                                           | 280-285                         |
| Reporting biases                               | 21     | Present assessments of risk of bias due to missing results (arising from reporting biases) for each synthesis assessed.                                                                                                                                                              | 291-318                         |
| Certainty of evidence                          | 22     | Present assessments of certainty (or confidence) in the body of evidence for each outcome assessed.                                                                                                                                                                                  | 280-285                         |
| <b>DISCUSSION</b>                              |        |                                                                                                                                                                                                                                                                                      |                                 |
| Discussion                                     | 23a    | Provide a general interpretation of the results in the context of other evidence.                                                                                                                                                                                                    | 320-487                         |
|                                                | 23b    | Discuss any limitations of the evidence included in the review.                                                                                                                                                                                                                      | 489-505                         |
|                                                | 23c    | Discuss any limitations of the review processes used.                                                                                                                                                                                                                                | 489-505                         |
|                                                | 23d    | Discuss implications of the results for practice, policy, and future research.                                                                                                                                                                                                       | 507-515                         |
| <b>OTHER INFORMATION</b>                       |        |                                                                                                                                                                                                                                                                                      |                                 |
| Registration and protocol                      | 24a    | Provide registration information for the review, including register name and registration number, or state that the review was not registered.                                                                                                                                       | 106                             |
|                                                | 24b    | Indicate where the review protocol can be accessed, or state that a protocol was not prepared.                                                                                                                                                                                       | 139                             |
|                                                | 24c    | Describe and explain any amendments to information provided at registration or in the protocol.                                                                                                                                                                                      | 101-196                         |
| Support                                        | 25     | Describe sources of financial or non-financial support for the review, and the role of the funders or sponsors in the review.                                                                                                                                                        | 522                             |
| Competing interests                            | 26     | Declare any competing interests of review authors.                                                                                                                                                                                                                                   | 532                             |
| Availability of data, code and other materials | 27     | Report which of the following are publicly available and where they can be found: template data collection forms; data extracted from included studies; data used for all analyses; analytic code; any other materials used in the review.                                           | 525                             |

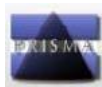

## **PRISMA 2020 Checklist**

*From:* Page MJ, McKenzie JE, Bossuyt PM, Boutron I, Hoffmann TC, Mulrow CD, et al. The PRISMA 2020 statement: an updated guideline for reporting systematic reviews. BMJ 2021;372:n71. doi: 10.1136/bmj.n71

For more information, visit: <http://www.prisma-statement.org/>

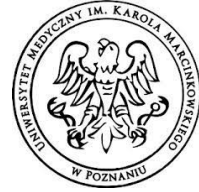

## Supplementary File S2 Systematic Review Search Strategy

### Systematic Review Search Strategy

Review title: The Role of Three-Dimensional Printing in Approaches in Endovascular Aortic Aneurysm Repair

Review team: Wiktoria Zasada, Magdalena Węglewska, Jerzy Kluba, Łukasz Świątek, Hubert Stępak, MD, PhD, prof. Zbigniew Krasiński MD, PhD

The search strategy was developed by and will be conducted by Wiktoria Zasada. The strategy was peer-reviewed and piloted and will be updated as needed based on database-specific language or other requirements within the following databases:

- MEDLINE (PubMed)
- CAB Abstracts (Web of Science)
- CINAHL (Ebsco)
- Web of Science Core Collection (Web of Science)
- EMBASE
- Cochrane Library
- ClinicalTrials.gov
- Scopus Science Direct
- Google Scholar [scholar.google.com/](https://scholar.google.com/)

For non-indexed conference proceedings, the review team will search relevant conference proceedings and websites (e.g. ProceedingsFirst, CDC, Google Scholar, OpenGrey.eu). In addition, the review team will hand-search bibliographies of relevant systematic reviews, narrative reviews, and meta-analyses found, as well as and relevant citations bibliographies of the articles included in the review.

We will not include or exclude studies based on the publication dates, and only content published or available in English will be included. To ensure the content accurately reflects research reported within the review's proposed time frame, monthly search alerts will be established for each database and monitored after the initial search, and eligible articles will be added to our review through the data extraction phase

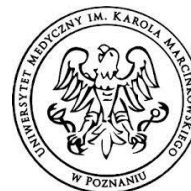

## Supplementary File S2 Systematic Review Search Strategy

Version of a systematic review search strategy constructed for MEDLINE (PubMed).

| # | Search strategy                                                                                                                                                                                                                                                                                                                                                                                                                                                                                                                                                                                                                                                                                                                                                   | # of results |
|---|-------------------------------------------------------------------------------------------------------------------------------------------------------------------------------------------------------------------------------------------------------------------------------------------------------------------------------------------------------------------------------------------------------------------------------------------------------------------------------------------------------------------------------------------------------------------------------------------------------------------------------------------------------------------------------------------------------------------------------------------------------------------|--------------|
| 1 | Aortic Aneurysm[mh] OR Aortic Aneurysm, Abdominal[mh] OR Aortic Aneurysm, Thoracic[mh] OR Aortic Aneurysm, Ruptured[mh] OR Abdominal Aortic Aneurysm[tiab] OR Thoracic Aortic Aneurysm[tiab] OR Aneurysm, False[tiab] OR AAA[tiab] OR AAAs[tiab] OR Endovascular Aortic Repair[tiab] OR Aortic Stent Grafting[tiab] OR Fenestrated Endovascular Aneurysm Repair[tiab] OR FEVAR[tiab] OR Aortic Aneurysm Repair[tiab] OR Juxtarenal Aneurysm[tiab] OR Physician Modified[tiab] OR Surgeon Modified[tiab] OR Surgeon-Modified[tiab] OR Surgeon-Modified Stent Graft[tiab] OR Surgeon Modified Stent Graft[tiab] OR Physician-Modified Stent Graft[tiab] OR Physician Modified Stent Graft[tiab] OR PMSGs[tiab] OR PMSG[tiab] OR Template-Assisted Stent Graft[tiab] | 78,887       |
| 2 | Three-Dimensional Printing[mh] OR 3D Printing[mh] OR Three-Dimensional Print*[tiab] OR 3D Print*[tiab] OR 3-D Print*[tiab] OR 3d-printing[tiab] OR Patient-Specific Modeling[tiab] OR Personalized Printing[tiab] OR Template-Assisted Printing[tiab] OR (three dimensional printing OR three-dimensional printing OR 3D printing OR 3d printing OR 3-d printing OR 3d-printing OR patient-specific modeling OR personalized printing OR template-assisted printing)                                                                                                                                                                                                                                                                                              | 49,452       |
| 3 | #1 AND #2                                                                                                                                                                                                                                                                                                                                                                                                                                                                                                                                                                                                                                                                                                                                                         | 270          |

# Supplementary File S3 Table of studies and extracted variables

|      | Author             | Reference                   | Year of public | Country     | Number of patient | Type of surgery | Software                                             | Model of the 3D printer | Polymer used for printing                                      | Estimated cost | Time spent for printing                           | Mean stent modification time | Name of the endograft modified                                               | Sterilization technique                      | Mean time of cannulation | Fluoroscopy time | Contrast agent volume | Mean procedure time    | Optimal angiography | Average intraoperative blood loss | Mean hospital stay duration | Mean postoperative | 30 day survival rate | Mean follow-up                                                                        | Types of settings                                                                          |
|------|--------------------|-----------------------------|----------------|-------------|-------------------|-----------------|------------------------------------------------------|-------------------------|----------------------------------------------------------------|----------------|---------------------------------------------------|------------------------------|------------------------------------------------------------------------------|----------------------------------------------|--------------------------|------------------|-----------------------|------------------------|---------------------|-----------------------------------|-----------------------------|--------------------|----------------------|---------------------------------------------------------------------------------------|--------------------------------------------------------------------------------------------|
| Unit | -                  | -                           | -              | -           | -                 | -               | -                                                    | -                       | -                                                              | USD            | minutes                                           | minutes                      | -                                                                            | -                                            | minutes                  | minutes          | mL                    | minutes                | %                   | mL                                | days                        | days               | %                    | months                                                                                | -                                                                                          |
|      | Fu et al. [x]      | <a href="#">sbi.nlm.nih</a> | 2023           | China       | 44                | FEVAR, BEVAR    | Mimics, Geomagic Studio 2014, Geomagic Design Direct | Eden260VS               | NA                                                             | NA             | 180                                               | 44.05 ± 7.72                 | Ankura, Valiant Captivia, Endurant, Fluency, Viabahn                         | Ethylene Oxide                               | NA                       | NA               | 134.59 ± 24.24        | 298.2 ± 84             | 100                 | 480.91 (100–2810)                 | 9.91 ± 4.47                 | 1.02 (0-5)         | 100                  | 6 for 42 patients, 12 for 35 patients                                                 | Experienced university center                                                              |
|      | Rynio et al. [x]   | <a href="#">sbi.nlm.nih</a> | 2022           | Poland      | 43                | FEVAR, BEVAR    | 3D Slicer 11.0, PreForm                              | Form 2                  | Standard clear resin                                           | 5 ± 2          | 361 ± 114                                         | 86 ± 12                      | Valiant Captiva                                                              | Hydrogen Peroxide plasma, Ethylene Oxide gas | NA                       | NA               | 17.67 ± 36.70         | 247 ± 70               | 86.05               | NA                                | 8 ± 12                      | NA                 | 88                   | 14 ± 12                                                                               | Center with no prior experience in complex endovascular aortic repairs                     |
|      | Branzan et al. [x] | <a href="#">sbi.nlm.nih</a> | 2021           | Germany     | 19                | FEVAR           | Geomagic DesignX 2019                                | Form 2                  | Biocompatible Dental SG resin                                  | NA             | 420 (segmentation, printing, and post-processing) | 109.6 ± 10.7                 | Valiant Captivia, Endurant                                                   | Steam pressure                               | 78                       | 55               | 77.7 ± 34.9           | 161±95                 | 100                 | NA                                | 17.3                        | 2.8                | 100                  | 14.4                                                                                  | The single centre, single surgeon experience from few years of performing these surgeries. |
|      | Zheng et al. [x]   | <a href="#">sbi.nlm.nih</a> | 2023           | China       | 32                | TEVAR           | Mimics, Geomagic Studio 2014                         | Eden260VS               | Photosensitive resin                                           | 410            | NA                                                | 37.63 ± 2.99                 | Ankura                                                                       | Ethylene Oxide                               | NA                       | NA               | NA                    | 147.84 ± 33.94         | 100                 | NA                                | NA                          | NA                 | 100                  | 16.14 ± 3.76                                                                          | NA                                                                                         |
|      | Tong et al. [x]    | <a href="#">sbi.nlm.nih</a> | 2020           | China       | 34                | TEVAR           | Mimics, Geomagic Studio 2014, EndoSize, CAD          | Eden260VS               | MED610 (Stratasys) materials                                   | NA             | 180                                               | 75.6 ± 21                    | Ankura, Endurant, Zenith, Viabahn                                            | Ethylene Oxide                               | NA                       | NA               | 224.58 ± 45.33        | 336 ± 72               | 100                 | 355.48 ± 172.38                   | 10.22 ± 3.65                | 0.82 (0–4)         | 100                  | 8.5                                                                                   | Tertiary center with extensive clinical experience.                                        |
|      | hee et al. [x]     | <a href="#">sbi.nlm.nih</a> | 2021           | South Korea | 20                | TEVAR           | NA                                                   | ProJet CJP              | VisiJet PXL Core powder, VisiJet PXL clear binder, Color bonds | NA             | NA                                                | NA                           | Hemashield Platinum straight graft (MAQUET Cardiovascular LLC, San Jose, CA) | NA                                           | NA                       | NA               | NA                    | 441 (IQR, 392.8–492.3) | 100                 | 500 (IQR, 300–800)                | 22 (IQR, 15–29)             | 6 (IQR, 5–10)      | 100                  | median: 35 (range 1–56 months) - data for joined group - with and without 3D printing | Repairs performed by a single surgeon in a high-volume center.                             |

| Variable                                                   | Unit        |
|------------------------------------------------------------|-------------|
| Reference                                                  | N/A         |
| Source                                                     | N/A         |
| Country                                                    | N/A         |
| Number of patients                                         | N/A         |
| Type of surgery                                            | N/A         |
| Software                                                   | N/A         |
| Model of the 3D printer                                    | N/A         |
| Polymer used for printing                                  | N/A         |
| Estimated cost of printing                                 | USD         |
| Time spent for printing                                    | minutes     |
| Mean stent modification time                               | minutes     |
| Name of the endograft modified                             | N/A         |
| Sterilization technique                                    | N/A         |
| Mean time of cannulation                                   | minutes     |
| Fluoroscopy time                                           | minutes     |
| Contrast agent volume                                      | milliliters |
| Mean procedure time                                        | minutes     |
| Optimal angiographic result obtained                       | %           |
| Average intraoperative blood loss                          | milliliters |
| Mean hospital stay duration                                | days        |
| Complications                                              | N/A         |
| Mean postoperative intensive care unit monitoring duration | days        |
| 30-day survival rate                                       | %           |
| Mean follow-up                                             | months      |
| Types of settings                                          | N/A         |

**Table 1.** Extracted variables along with their respective units.



**METHODOLOGICAL INDEX FOR NON-RANDOMIZED STUDIES (MINORS)**

For: The Utility of Three-Dimensional Printing in Physician-Modified Stent-Grafts for Aortic Lesions Repair

Assessed study: Branzan et al. The Influence of 3D Printed Aortic Models on the Evolution of Physician Modified Stent Grafts for the Urgent Treatment of Thoraco-abdominal and Pararenal Aortic Pathologies

|                                                                                                                                                                                                                                                                                                                                                                                                                                                                                                             |             |
|-------------------------------------------------------------------------------------------------------------------------------------------------------------------------------------------------------------------------------------------------------------------------------------------------------------------------------------------------------------------------------------------------------------------------------------------------------------------------------------------------------------|-------------|
| <b>1. A clearly stated aim:</b> the question addressed should be precise and relevant in the light of available literature                                                                                                                                                                                                                                                                                                                                                                                  | Score (0-2) |
| Answer: The aim was stated and relevant to available literature: "The aim was to describe the outcomes of high risk patients with symptomatic or contained rupture of pararenal (PRAs) and thoraco-abdominal aortic aneurysms (TAAAs) with anatomy unsuitable for commercially available stent grafts who underwent fenestrated endovascular aneurysm repair (FEVAR) using physician modified stent grafts (PMSGs) planned with 3D image analysis software (3DIMAS), and 3D printed aortic models (3DAMs)." | 2           |
| <b>2. Inclusion of consecutive patients:</b> all patients potentially fit for inclusion (satisfying the criteria for inclusion) have been included in the study during the study period (no exclusion or details about the reasons for exclusion)                                                                                                                                                                                                                                                           |             |
| Answer: "Candidates for treatment with a PMSG were patients at anatomical and/or medical high risk of open repair,9 presenting with painful aneurysms, haemodynamically stable contained aortic ruptures, or symptomatic suture aneurysm after open AAA repair, where the available off the shelf branched stent grafts were not suitable due to anatomical constraints."                                                                                                                                   | 2           |
| <b>3. Prospective collection of data:</b> data were collected according to a protocol established before the beginning of the study                                                                                                                                                                                                                                                                                                                                                                         |             |
| Answer: It is an retrospective trial, some of the measurements are not typically assessed during the normal treatment so there had to be some planned measurments                                                                                                                                                                                                                                                                                                                                           | 1           |
| <b>4. Endpoints appropriate to the aim of the study:</b> unambiguous explanation of the criteria used to evaluate the main outcome which should be in accordance with the question addressed by the study. Also, the endpoints should be assessed on an intention-to-treat basis.                                                                                                                                                                                                                           |             |
| Answer: Appropriately chosen measurements to access the outcome, explained in introduction and evaluated in discussion section: "Endpoints were all cause mortality, freedom from any endoleak, target vessel patency, and re-intervention"                                                                                                                                                                                                                                                                 | 2           |
| <b>5. Unbiased assessment of the study endpoint:</b> blind evaluation of objective endpoints and double-blind evaluation of subjective endpoints. Otherwise the reasons for not blinding should be stated                                                                                                                                                                                                                                                                                                   |             |
| Answer: No reported blind evaluation of accessed data                                                                                                                                                                                                                                                                                                                                                                                                                                                       | 0           |
| <b>6. Follow-up period appropriate to the aim of the study:</b> the follow-up should be sufficiently long to allow the assessment of the main endpoint and possible adverse events                                                                                                                                                                                                                                                                                                                          |             |
| Answer: Mean follow up was 14.4 months - sufficient                                                                                                                                                                                                                                                                                                                                                                                                                                                         | 2           |
| <b>7. Loss to follow up less than 5%:</b> all patients should be included in the follow up. Otherwise, the proportion lost to follow up should not exceed the proportion experiencing the major endpoint                                                                                                                                                                                                                                                                                                    |             |
| Answer: "Follow up imaging was obtained in all patients" no loss in follow-up                                                                                                                                                                                                                                                                                                                                                                                                                               | 2           |
| <b>8. Prospective calculation of the study size:</b> information of the size of detectable difference of interest with a calculation of 95% confidence interval,                                                                                                                                                                                                                                                                                                                                            |             |

|                                                                                                                                                                           |               |
|---------------------------------------------------------------------------------------------------------------------------------------------------------------------------|---------------|
| according to the expected incidence of the outcome event, and information about the level for statistical significance and estimates of power when comparing the outcomes |               |
| Answer: not reported                                                                                                                                                      | 0             |
| <b>Overall grade</b>                                                                                                                                                      | Overall score |
| Moderate quality                                                                                                                                                          | 11            |

Scoring: 0 – not reported, 1 – reported but inadequately, 2 – reported adequately

Overall score grading:  $\geq 8$  - poor quality, 9 – 12 – moderate quality, 13 – 16 – good quality

**METHODOLOGICAL INDEX FOR NON-RANDOMIZED STUDIES (MINORS)**

For: The Utility of Three-Dimensional Printing in Physician-Modified Stent-Grafts for Aortic Lesions Repair

Assessed study: Tong et al. Use of 3D Printing to Guide Creation of Fenestrations in Physician-Modified Stent- Grafts for Treatment of Thoracoabdominal Aortic Disease

|                                                                                                                                                                                                                                                                                                                                                                                          |               |
|------------------------------------------------------------------------------------------------------------------------------------------------------------------------------------------------------------------------------------------------------------------------------------------------------------------------------------------------------------------------------------------|---------------|
| <b>1. A clearly stated aim:</b> the question addressed should be precise and relevant in the light of available literature                                                                                                                                                                                                                                                               | Score (0-2)   |
| Answer: The aim is described as: "To summarize the experience and outcomes of total endovascular repair of thoracoabdominal aortic disease using 3-dimensional (3D) printed models to guide on-site creation of fenestrations in aortic stent-grafts." It could be more directly described                                                                                               | 1             |
| <b>2. Inclusion of consecutive patients:</b> all patients potentially fit for inclusion (satisfying the criteria for inclusion) have been included in the study during the study period (no exclusion or details about the reasons for exclusion)                                                                                                                                        |               |
| Answer: inclusion was presented sufficiently: "The indications for stent-graft implantation in the setting of aortic dissection included a maximum dissecting aneurysm >50 mm, a false lumen diameter twice that of the true lumen and progressively enlarging (>10 mm/y), multiple tears or one tear >22 mm in diameter, ischemia of the lower extremity or branch arteries, and pain". | 2             |
| <b>3. Prospective collection of data:</b> data were collected according to a protocol established before the beginning of the study                                                                                                                                                                                                                                                      |               |
| Answer: the study protocol is mentioned "The study protocol was approved by the institutional review board of Nanjing Drum Tower Hospital"                                                                                                                                                                                                                                               | 2             |
| <b>4. Endpoints appropriate to the aim of the study:</b> unambiguous explanation of the criteria used to evaluate the main outcome which should be in accordance with the question addressed by the study. Also, the endpoints should be assessed on an intention-to-treat basis.                                                                                                        |               |
| Answer: It has been described in introduction section                                                                                                                                                                                                                                                                                                                                    | 2             |
| <b>5. Unbiased assessment of the study endpoint:</b> blind evaluation of objective endpoints and double-blind evaluation of subjective endpoints. Otherwise the reasons for not blinding should be stated                                                                                                                                                                                |               |
| Answer: No blind evaluation reported                                                                                                                                                                                                                                                                                                                                                     | 0             |
| <b>6. Follow-up period appropriate to the aim of the study:</b> the follow-up should be sufficiently long to allow the assessment of the main endpoint and possible adverse events                                                                                                                                                                                                       |               |
| Answer: Follow up was 8.5 months – slightly shorter than the rest of studies                                                                                                                                                                                                                                                                                                             | 1             |
| <b>7. Loss to follow up less than 5%:</b> all patients should be included in the follow up. Otherwise, the proportion lost to follow up should not exceed the proportion experiencing the major endpoint                                                                                                                                                                                 |               |
| Answer: One patient died 3%                                                                                                                                                                                                                                                                                                                                                              | 2             |
| <b>8. Prospective calculation of the study size:</b> information of the size of detectable difference of interest with a calculation of 95% confidence interval, according to the expected incidence of the outcome event, and information about the level for statistical significance and estimates of power when comparing the outcomes                                               |               |
| Answer: not reported                                                                                                                                                                                                                                                                                                                                                                     | 0             |
| <b>Overall grade</b>                                                                                                                                                                                                                                                                                                                                                                     | Overall score |
| Moderate quality                                                                                                                                                                                                                                                                                                                                                                         | 10            |

Scoring: 0 – not reported, 1 – reported but inadequately, 2 – reported adequately

Overall score grading:  $\geq 8$  - poor quality, 9 – 12 – moderate quality, 13 – 16 – good quality

**METHODOLOGICAL INDEX FOR NON-RANDOMIZED STUDIES (MINORS)**

For: The Utility of Three-Dimensional Printing in Physician-Modified Stent-Grafts for Aortic Lesions Repair

Assessed study: Zheng et al. "3D Printing-Assisted versus Conventional Extracorporeal Fenestration Tevar for Stanford Type B Arteries Dissection with Undesirable Proximal Anchoring Zone: Efficacy Analysis"

|                                                                                                                                                                                                                                                                                                                                                                                                                                                                                             |             |
|---------------------------------------------------------------------------------------------------------------------------------------------------------------------------------------------------------------------------------------------------------------------------------------------------------------------------------------------------------------------------------------------------------------------------------------------------------------------------------------------|-------------|
| <b>1. A clearly stated aim:</b> the question addressed should be precise and relevant in the light of available literature                                                                                                                                                                                                                                                                                                                                                                  | Score (0-2) |
| Answer: The aim has been clearly stated: " This study aims to evaluate the short-term and mid-term clinical outcomes, strengths and weaknesses of 3D printing-assisted extracorporeal fenestration TEVAR versus conventional extracorporeal fenestration TEVAR for treating TBAD patients with undesirable proximal anchoring zone"                                                                                                                                                         | 2           |
| <b>2. Inclusion of consecutive patients:</b> all patients potentially fit for inclusion (satisfying the criteria for inclusion) have been included in the study during the study period (no exclusion or details about the reasons for exclusion)                                                                                                                                                                                                                                           |             |
| Answer: Inclusion criteria were clearly defined: "The inclusion criteria were: (1) Diagnosed as type B AD based on the patient's medical history and preoperative CTA, according to the AD classification criteria (Stanford classification); (2) Preoperative CTA indicated that the distance between the intimal tear and LSA was <15 mm; (3) Preoperative CTA demonstrated that the dissection retrograde tear or hematoma had involved LSA; (4) No severe liver or kidney dysfunction." | 2           |
| <b>3. Prospective collection of data:</b> data were collected according to a protocol established before the beginning of the study                                                                                                                                                                                                                                                                                                                                                         |             |
| Answer: No reported established protocol, however the measured data has been pointed out.                                                                                                                                                                                                                                                                                                                                                                                                   | 1           |
| <b>4. Endpoints appropriate to the aim of the study:</b> unambiguous explanation of the criteria used to evaluate the main outcome which should be in accordance with the question addressed by the study. Also, the endpoints should be assessed on an intention-to-treat basis.                                                                                                                                                                                                           |             |
| Answer The clinical outcomes measures included operative success rate, device deployment success rate (defined as successful positioning and release of the main stent graft during surgery, successful isolation of aneurysm, dissection proximal tear, etc.), intraoperative and postoperative complication rate, secondary intervention rate, mortality rate, etc"                                                                                                                       | 2           |
| <b>5. Unbiased assessment of the study endpoint:</b> blind evaluation of objective endpoints and double-blind evaluation of subjective endpoints. Otherwise the reasons for not blinding should be stated                                                                                                                                                                                                                                                                                   |             |
| Answer: No blinding has been implemented                                                                                                                                                                                                                                                                                                                                                                                                                                                    | 0           |
| <b>6. Follow-up period appropriate to the aim of the study:</b> the follow-up should be sufficiently long to allow the assessment of the main endpoint and possible adverse events                                                                                                                                                                                                                                                                                                          |             |
| Answer: The mean follow up was 16 months, which is sufficiently long                                                                                                                                                                                                                                                                                                                                                                                                                        | 2           |
| <b>7. Loss to follow up less than 5%:</b> all patients should be included in the follow up. Otherwise, the proportion lost to follow up should not exceed the proportion experiencing the major endpoint                                                                                                                                                                                                                                                                                    |             |
| Answer: No loss of patients in follow-up reported                                                                                                                                                                                                                                                                                                                                                                                                                                           | 2           |
| <b>8. Prospective calculation of the study size:</b> information of the size of detectable difference of interest with a calculation of 95% confidence interval,                                                                                                                                                                                                                                                                                                                            |             |

|                                                                                                                                                                                                                                                                                                                                                        |         |
|--------------------------------------------------------------------------------------------------------------------------------------------------------------------------------------------------------------------------------------------------------------------------------------------------------------------------------------------------------|---------|
| according to the expected incidence of the outcome event, and information about the level for statistical significance and estimates of power when comparing the outcomes                                                                                                                                                                              |         |
| Answer: No prospective calculation of study size reported                                                                                                                                                                                                                                                                                              | 0       |
| <i>Additional criteria in the case of comparative study</i>                                                                                                                                                                                                                                                                                            |         |
| 9. <b>An adequate control group:</b> having a gold standard diagnostic test or therapeutic intervention recognized as the optimal intervention according to the available published data                                                                                                                                                               |         |
| Answer: The control was a group of standard (conventional) PMSG                                                                                                                                                                                                                                                                                        | 2       |
| 10. <b>Contemporary groups:</b> control and studied group should be managed during the same time period (no historical comparison)                                                                                                                                                                                                                     |         |
| Answer: The groups came from the same period                                                                                                                                                                                                                                                                                                           | 2       |
| 11. <b>Baseline equivalence of groups:</b> the groups should be similar regarding the criteria other than the studied endpoints. Absence of confounding factors that could bias the interpretation of the results                                                                                                                                      |         |
| Answer: The groups did not have significant differences, it is presented in Table 1                                                                                                                                                                                                                                                                    | 2       |
| 12. <b>Adequate statistical analyses:</b> whether the statistics were in accordance with the type of study with calculation of confidence intervals or relative risk                                                                                                                                                                                   |         |
| Answer: Statistical analysis was adequate "Data with normal distribution were analyzed by independent samples t- test, and data with non-normal distribution were analyzed by non-parametric test (Mann-Whitney U test). Categorical data were compared by chi-square test or Fisher exact test. Two-sided test, significance level $\alpha = 0.05$ ." | 2       |
| <b>Overall grade</b>                                                                                                                                                                                                                                                                                                                                   | Overall |
| moderate quality                                                                                                                                                                                                                                                                                                                                       | score   |
|                                                                                                                                                                                                                                                                                                                                                        | 19/24   |

Scoring: 0 – not reported, 1 – reported but inadequately, 2 – reported adequately

Overall score grading for non-comparative:  $\geq 8$  - poor quality, 9 – 14 – moderate quality, 15 – 16 – good quality. For comparative:  $\geq 14$  - poor quality, 15 – 22 – moderate quality, 23 – 24 – good quality

**METHODOLOGICAL INDEX FOR NON-RANDOMIZED STUDIES (MINORS)**

For: The Utility of Three-Dimensional Printing in Physician-Modified Stent-Grafts for Aortic Lesions Repair

Assessed study: Rynio et al. Initial Experience with Fenestrated Physician-Modified Stent Grafts Using 3D Aortic Templates

|                                                                                                                                                                                                                                                                                                                                                                                                                                      |               |
|--------------------------------------------------------------------------------------------------------------------------------------------------------------------------------------------------------------------------------------------------------------------------------------------------------------------------------------------------------------------------------------------------------------------------------------|---------------|
| <b>1. A clearly stated aim:</b> the question addressed should be precise and relevant in the light of available literature                                                                                                                                                                                                                                                                                                           | Score (0-2)   |
| Answer: The aim/purpose of the study has been clearly stated: "The purpose of this study was to report the surgical results of PMEG using a 3D template in a center with no previous experience in complex endovascular aortic repairs"                                                                                                                                                                                              | 2             |
| <b>2. Inclusion of consecutive patients:</b> all patients potentially fit for inclusion (satisfying the criteria for inclusion) have been included in the study during the study period (no exclusion or details about the reasons for exclusion)                                                                                                                                                                                    |               |
| Answer: The inclusion criteria has been clearly stated: "The inclusion criteria were juxtarenal and suprarenal aortic aneurysms, type IV thoracoabdominal aneurysms, and type IA endoleak after endovascular aortic repair. In asymptomatic patients, the diameter threshold for aneurysm repair was 5.5 cm in males and 5.0 cm in women. At aortic team meetings, all cases were discussed and rated as high risk for open surgery" | 2             |
| <b>3. Prospective collection of data:</b> data were collected according to a protocol established before the beginning of the study                                                                                                                                                                                                                                                                                                  |               |
| Answer: No reported protocol before reported however its interventional study and all needed data has been collected during surgery                                                                                                                                                                                                                                                                                                  | 1             |
| <b>4. Endpoints appropriate to the aim of the study:</b> unambiguous explanation of the criteria used to evaluate the main outcome which should be in accordance with the question addressed by the study. Also, the endpoints should be assessed on an intention-to-treat basis.                                                                                                                                                    |               |
| Answer: The endpoint is appropriate to the aim of the study, described in table 1 of this article                                                                                                                                                                                                                                                                                                                                    | 2             |
| <b>5. Unbiased assessment of the study endpoint:</b> blind evaluation of objective endpoints and double-blind evaluation of subjective endpoints. Otherwise the reasons for not blinding should be stated                                                                                                                                                                                                                            |               |
| Answer: No reported blind evaluation of endpoints                                                                                                                                                                                                                                                                                                                                                                                    | 0             |
| <b>6. Follow-up period appropriate to the aim of the study:</b> the follow-up should be sufficiently long to allow the assessment of the main endpoint and possible adverse events                                                                                                                                                                                                                                                   |               |
| Answer: Follow up was appropriate, "the mean follow-up was 14 ± 12 months."                                                                                                                                                                                                                                                                                                                                                          | 2             |
| <b>7. Loss to follow up less than 5%:</b> all patients should be included in the follow up. Otherwise, the proportion lost to follow up should not exceed the proportion experiencing the major endpoint                                                                                                                                                                                                                             |               |
| Answer: 17 deaths during the follow -up, no information if excluded from follow-up                                                                                                                                                                                                                                                                                                                                                   | 0             |
| <b>8. Prospective calculation of the study size:</b> information of the size of detectable difference of interest with a calculation of 95% confidence interval, according to the expected incidence of the outcome event, and information about the level for statistical significance and estimates of power when comparing the outcomes                                                                                           |               |
| Answer: not reported                                                                                                                                                                                                                                                                                                                                                                                                                 |               |
| <b>Overall grade</b>                                                                                                                                                                                                                                                                                                                                                                                                                 | Overall score |
| Moderate quality                                                                                                                                                                                                                                                                                                                                                                                                                     |               |

|  |   |
|--|---|
|  | 9 |
|--|---|

Scoring: 0 – not reported, 1 – reported but inadequately, 2 – reported adequately

Overall score grading:  $\geq 8$  - poor quality, 9 – 12 – moderate quality, 13 – 16 – good quality



**METHODOLOGICAL INDEX FOR NON-RANDOMIZED STUDIES (MINORS)**

For: The Utility of Three-Dimensional Printing in Physician-Modified Stent-Grafts for Aortic Lesions Repair

Assessed study: Fu et al. Three-Dimensional Printing to Guide Fenestrated/Branched TEVAR in Triple Aortic Arch Branch Reconstruction With a Curative Effect Analysis

|                                                                                                                                                                                                                                                                                                                                                                                                                                                                                                                                                                                           |             |
|-------------------------------------------------------------------------------------------------------------------------------------------------------------------------------------------------------------------------------------------------------------------------------------------------------------------------------------------------------------------------------------------------------------------------------------------------------------------------------------------------------------------------------------------------------------------------------------------|-------------|
| <b>1. A clearly stated aim:</b> the question addressed should be precise and relevant in the light of available literature                                                                                                                                                                                                                                                                                                                                                                                                                                                                | Score (0-2) |
| Answer: The aim has been stated: "Three-dimensional (3D) printing technology has become a leading manufacturing technique in health care and medicine, it enables the production of anatomically matched and patient-specific devices and constructs with high tunability and complexity. <sup>4</sup> At our center, we used this technology to print anatomical models rather than medical devices, which allowed individualized and accurate positioning of the fenestrations for the aortic arch branches."                                                                           | 2           |
| <b>2. Inclusion of consecutive patients:</b> all patients potentially fit for inclusion (satisfying the criteria for inclusion) have been included in the study during the study period (no exclusion or details about the reasons for exclusion)                                                                                                                                                                                                                                                                                                                                         |             |
| Answer: The inclusion criteria has been stated: "Indications for SG implantation included asymptomatic, degenerative, or traumatic aneurysms larger than 5 cm and all cystic aneurysms. In the setting of aortic arch dissection, the indications included a maximum dissecting aneurysm >50 mm, a false lumen diameter twice that of the true lumen and progressively enlarging (>10 mm/y), the pain in the chest or hoarseness of the voice, comorbid conditions, such as other ascending or descending aortic diseases, Marfan syndrome, family history of aortic dissection rupture." | 2           |
| <b>3. Prospective collection of data:</b> data were collected according to a protocol established before the beginning of the study                                                                                                                                                                                                                                                                                                                                                                                                                                                       |             |
| Answer: The collected data must be planned in advance as these are the operation data, such as operation time, modification time which are not routinely measured                                                                                                                                                                                                                                                                                                                                                                                                                         | 1           |
| <b>4. Endpoints appropriate to the aim of the study:</b> unambiguous explanation of the criteria used to evaluate the main outcome which should be in accordance with the question addressed by the study. Also, the endpoints should be assessed on an intention-to-treat basis.                                                                                                                                                                                                                                                                                                         |             |
| Answer: The assessed data are presented in the table 2. Reported but inadequately,                                                                                                                                                                                                                                                                                                                                                                                                                                                                                                        | 1           |
| <b>5. Unbiased assessment of the study endpoint:</b> blind evaluation of objective endpoints and double-blind evaluation of subjective endpoints. Otherwise the reasons for not blinding should be stated                                                                                                                                                                                                                                                                                                                                                                                 |             |
| Answer: no blinding implemented and reported                                                                                                                                                                                                                                                                                                                                                                                                                                                                                                                                              | 0           |
| <b>6. Follow-up period appropriate to the aim of the study:</b> the follow-up should be sufficiently long to allow the assessment of the main endpoint and possible adverse events                                                                                                                                                                                                                                                                                                                                                                                                        |             |
| Answer: Follow – up adequate (22.3 months)                                                                                                                                                                                                                                                                                                                                                                                                                                                                                                                                                | 2           |
| <b>7. Loss to follow up less than 5%:</b> all patients should be included in the follow up. Otherwise, the proportion lost to follow up should not exceed the proportion experiencing the major endpoint                                                                                                                                                                                                                                                                                                                                                                                  |             |
| Answer: two patients died which equals 4.6% of the patients lost in follow -up                                                                                                                                                                                                                                                                                                                                                                                                                                                                                                            | 2           |
| <b>8. Prospective calculation of the study size:</b> information of the size of detectable difference of interest with a calculation of 95% confidence interval,                                                                                                                                                                                                                                                                                                                                                                                                                          |             |

|                                                                                                                                                                           |               |
|---------------------------------------------------------------------------------------------------------------------------------------------------------------------------|---------------|
| according to the expected incidence of the outcome event, and information about the level for statistical significance and estimates of power when comparing the outcomes |               |
| Answer: not reported                                                                                                                                                      | 0             |
| <b>Overall grade</b>                                                                                                                                                      | Overall score |
| Moderate quality                                                                                                                                                          | 9             |

Scoring: 0 – not reported, 1 – reported but inadequately, 2 – reported adequately

Overall score grading:  $\geq 8$  - poor quality, 9 – 12 – moderate quality, 13 – 16 – good quality
